# Supplementary material for: Genetic architecture of grain yield in bread wheat based on genome-wide association studies
Source: BMC Plant Biol. 2019 Apr 29;19:168. doi: 10.1186/s12870-019-1781-3 (PMC6489268; doi:10.1186/s12870-019-1781-3)
Supplement: Supplementary file 3 — Table S2. Analysis of variance and broad-sense heritabilities (h2) for grain yield and related traits. (DOCX 13 kb) [file 12870_2019_1781_MOESM3_ESM.docx]

Table S2 Analysis of variance and broad-sense heritabilities (*h2*) for grain yield and related traits

| Trait | Mean square | | | | | *h2* |
| --- | --- | --- | --- | --- | --- | --- |
| Line (L) | Environment (E) | Replicate | L×E | Error |
| GY | 10,296,769** | 986,178,880** | 5,298,114** | 1,813,629** | 264,245 | 0.72 |
| SN | 82,536.2** | 2,376,391.0** | 45,276.1** | 7159.2** | 1106.1 | 0.89 |
| KNS | 593.5** | 792.7** | 290.7** | 25.2** | 8.9 | 0.93 |
| TKW | 451.3** | 8282.6** | 97.3** | 14.2** | 4.7 | 0.95 |
| KL | 2.03** | 51.98** | 0.43** | 0.05** | 0.03 | 0.97 |
| KW | 0.51** | 13.41** | 0.21** | 0.03** | 0.02 | 0.93 |
| SL | 13.4** | 72.4** | 5.7** | 0.6** | 0.3 | 0.93 |
| SDW | 1.01** | 28.37** | 0.04 | 0.10** | 0.05 | 0.89 |
| HD | 121.1** | 20935.5** | 16.6** | 3.9** | 0.5 | 0.94 |
| PH | 2048.8** | 11235.2** | 46.7* | 43.5** | 10.7 | 0.96 |
| UIL | 209.8** | 225.9** | 63.4** | 7.7** | 4.1 | 0.96 |
| FLL | 61.1** | 617.4** | 14.9** | 5.2** | 3.0 | 0.89 |
| FLW | 0.36** | 6.20** | 0.02 | 0.02** | 0.01 | 0.94 |

GY, grain yield; SN, spike number per square meter; KNS, kernel number per spike; TKW, thousand-kernel weight; KL, kernel length; KW, kernel width; SL, spike length; SDW, spike dry weight; HD, heading date; PH, plant height; UIL, uppermost internode length; FLL, flag leaf length; FLW, flag leaf width
